# Supplementary material for: Real-Life Considerations on Antifungal Treatment Combinations for the Management of Invasive Mold Infections after Allogeneic Cell Transplantation
Source: MDPI journal article supplement (doi:10.3390/jof7100811), 2021-09-28

## **Supplementary material**

### **Figure legends**

**Supplementary Figure S1.** Kaplan-Meier survival curves of all-cause-1-year mortality after the diagnosis of an invasive mold infection (IMI) according to IMI type: invasive aspergillosis (IA) versus non-IA IMI.

Supplementary Figure S1.

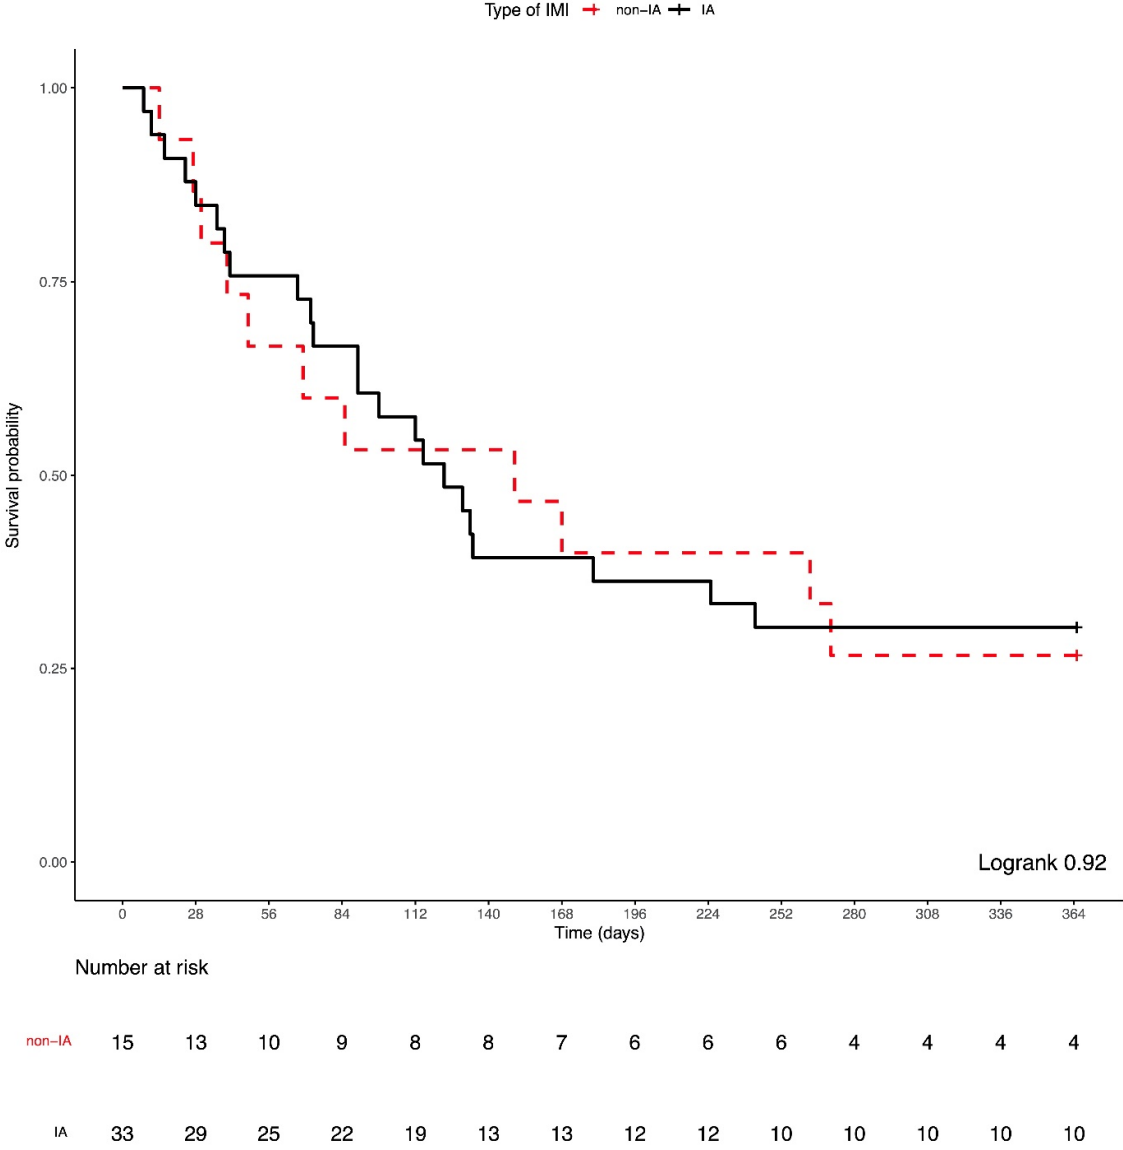

Supplement: s1 [file s1]
